## Recommended and non-recommended edoxaban dosing in patients with atrial fibrillation (AF): one-year clinical events from the Global ETNA-AF non-interventional study (NIS)

T.F. Chao<sup>1</sup>, P. Kirchhof<sup>2</sup>, Y. Koretsune<sup>3</sup>, T. Yamashita<sup>4</sup>, M. Unverdorben<sup>5</sup>, P. Reimitz<sup>6</sup>, C. Chen<sup>5</sup>, R. De Caterina<sup>7</sup>

<sup>1</sup>Taipei Veterans General Hospital, Taipei, Taiwan; <sup>2</sup>University of Birmingham, Institute of Cardiovascular Sciences, Birmingham, United Kingdom;

<sup>3</sup>Osaka National Hospital, Osaka, Japan; <sup>4</sup>Cardiovascular Institute, Tokyo, Japan; <sup>5</sup>Daiichi Sankyo, Inc., Basking Ridge, United States of America;

<sup>6</sup>Daiichi Sankyo Europe, GmbH, Munich, Germany; <sup>7</sup>University of Pisa, Pisa, Italy

**Funding Acknowledgement:** Type of funding source: Private company. Main funding source(s): Daiichi Sankyo

**Background:** In AF patients on direct oral anticoagulants (DOAC), safety and effectiveness vary with dose. This might impact treatment decisions.

**Purpose:** To investigate the effects of dosing of the DOAC edoxaban in AF patients on safety and effectiveness during 1-year observation in a real-world setting.

**Methods:** The Global ETNA-AF NIS included 26,823 patients. Baseline data by edoxaban dosing (60mg/30mg) and their influences on the safety (major bleeding [MB], clinically relevant non-major bleeding [CRNMB]), and effectiveness (stroke, systemic embolism, myocardial infarction [MI], death) were investigated (Table).

**Results:** Figure shows the breakdown by dose (60mg vs 30mg) and recommended (rec) vs non-recommended (non-rec) dosing. Patients on non-rec 30mg vs on rec 60mg edoxaban were older (mean  $\pm$  SD: 74 $\pm$ 9 vs 70 $\pm$ 9

y); had lower creatinine clearance (72.2 $\pm$ 20.6 vs 85.8 $\pm$ 26.8 mL/min); and had more comorbidities, history of MB (2.1% vs 1.1%), and strokes (11.0% vs 8.6%). Non-rec 60mg vs rec 30mg patients were younger (75 $\pm$ 9 vs 78 $\pm$ 9 y), had fewer comorbidities, history of MB (1.2% vs 2.6%), and strokes (10.2% vs 16.4%). In non-rec 30mg vs rec 60mg, MB was not lower and ischaemic events were not higher. In non-rec 60mg vs rec 30mg, no increase in MB, CRNMB or ischaemic events was seen.

**Conclusion:** Edoxaban was prescribed at the label recommended dose in the vast majority of patients. Non-rec 30mg patients were sicker than rec 60mg patients while non-rec 60mg patients were less sick than rec 30mg patients. Overall event rates were low, and ischaemic event rates of non-rec 30mg and bleeding event rates of non-rec 60mg were not numerically higher than that of corresponding rec dosing groups.

| Clinical events, N (%/yr) | No dose reduction criteria met |                          | $\geq 1$ dose reduction criterion met |                      |
|---------------------------|--------------------------------|--------------------------|---------------------------------------|----------------------|
|                           | Rec. 60 mg (N=12,708)          | Non-rec. 30 mg (N=3,016) | Non-rec. 60 mg (N=1,640)              | Rec. 30 mg (N=9,459) |
| Major bleeding (ISTH)     | 92 (0.77)                      | 31 (1.13)                | 18 (1.19)                             | 132 (1.61)           |
| ICH                       | 31 (0.26)                      | 5 (0.18)                 | 1 (0.07)                              | 38 (0.46)            |
| Major GI bleeding         | 32 (0.27)                      | 21 (0.76)                | 6 (0.39)                              | 81 (0.98)            |
| CRNMB                     | 177 (1.48)                     | 42 (1.53)                | 25 (1.65)                             | 226 (2.76)           |
| Ischaemic stroke/TIA      | 113 (0.94)                     | 20 (0.72)                | 16 (1.05)                             | 126 (1.53)           |
| Haemorrhagic stroke       | 20 (0.17)                      | 3 (0.11)                 | 1 (0.07)                              | 32 (0.39)            |
| MI                        | 42 (0.35)                      | 8 (0.29)                 | 5 (0.33)                              | 31 (0.38)            |
| Systemic embolism         | 8 (0.07)                       | 1 (0.04)                 | 1 (0.07)                              | 12 (0.15)            |
| All-cause mortality       | 214 (1.78)                     | 79 (2.86)                | 54 (3.54)                             | 398 (4.82)           |
| CV mortality              | 99 (0.82)                      | 37 (1.34)                | 21 (1.38)                             | 142 (1.72)           |

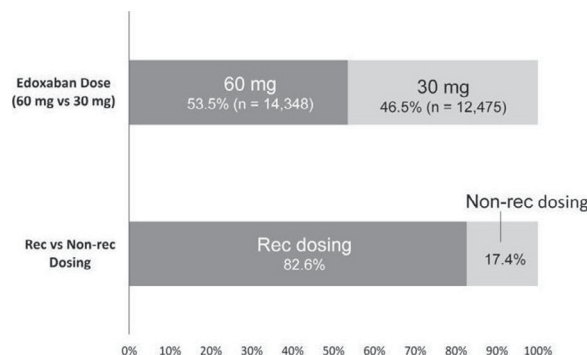

Source: http://academic.oup.com/eurheartj/article-pdf/41/Supplement_2/ehaa946.0657/34519939/ehaa946.0657.pdf
